# Supplementary material for: Highly efficient photocatalytic conversion of CO2 into solid CO using H2O as a reductant over Ag-modified ZnGa2O4
Source: Royal Society of Chemistry journal article supplement (doi:10.1039/c5ta01697e), 2015-01-01
Supplement: c5ta01697e1.pdf [file c5ta01697e1.pdf]

*Supporting Information*

## Highly efficient photocatalytic conversion of CO<sub>2</sub> into solid CO using H<sub>2</sub>O as a reductant over Ag-modified

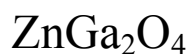

Zheng Wang<sup>a</sup>, Kentaro Teramura<sup>a,b,c\*</sup>, Saburo Hosokawa<sup>a,b</sup>, Tsunehiro Tanaka<sup>a,b,\*</sup>

- a. Department of Molecular Engineering, Graduate School of Engineering, Kyoto University, Kyoto 615-8510, Japan
- b. Elements Strategy Initiative for Catalysts & Batteries (ESICB), Kyoto University, 1-30 Goryo-Ohara, Nishikyo-ku, Kyoto 615-8245, Japan
- c. Precursory Research for Embryonic Science and Technology (PRESTO), Japan Science and Technology Agency (JST), 4-1-8 Honcho, Kawaguchi, Saitama 332-0012, Japan

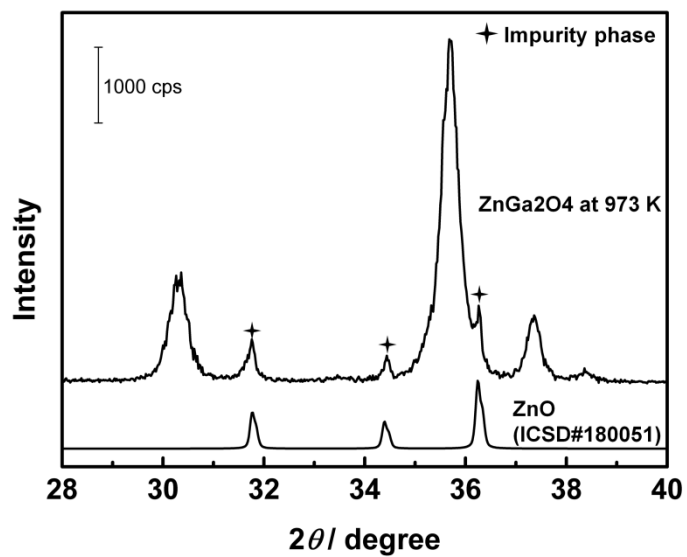

Figure S1 XRD patterns in the range between 28° and 40° of  $\text{ZnGa}_2\text{O}_4$  calcined at 973 K for 20 h and ZnO as a reference.

*Electronic Supplementary Information (ESI)*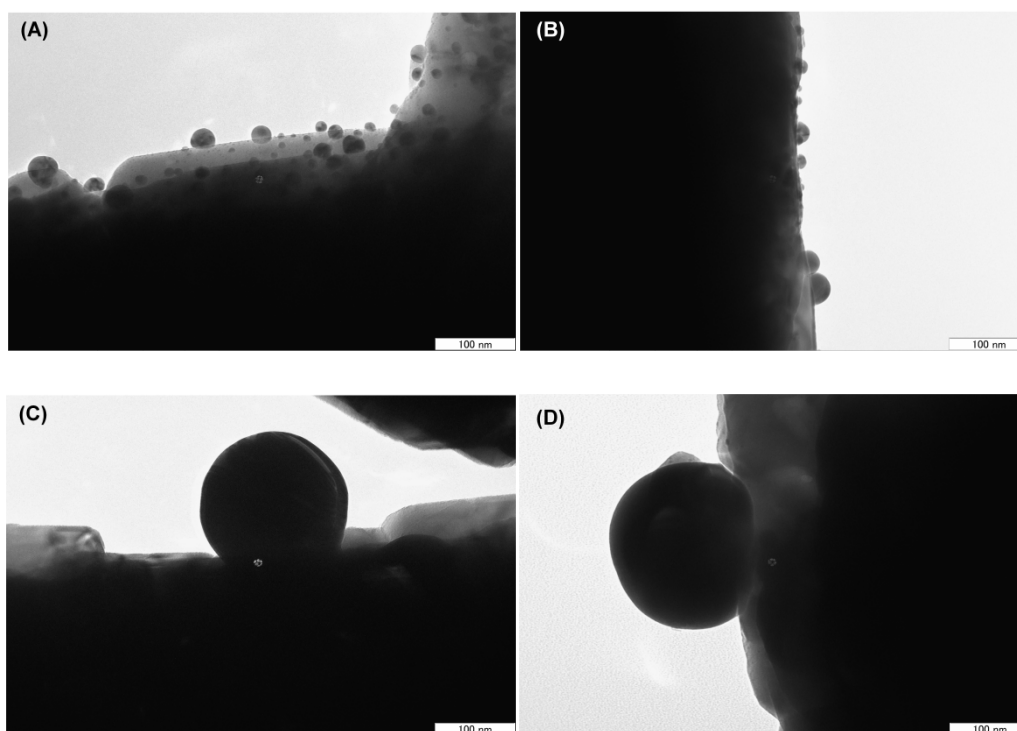

Figure S2 TEM images of Ag-modified ZnGa<sub>2</sub>O<sub>4</sub> prepared by chemical reduction method before (A, B) and after (C, D) the photocatalytic conversion of CO<sub>2</sub>. ZnGa<sub>2</sub>O<sub>4</sub> was calcined at 1123 K for 40 h. The loading amount of Ag cocatalyst was 1.0 wt%.
